# Supplementary material for: First-principles study of structural stability, dynamical and mechanical properties of Li2FeSiO4 polymorphs
Source: Royal Society of Chemistry journal article supplement (doi:10.1039/c6ra26555c), 2017-01-01
Supplement: c6ra26555c1.pdf [file c6ra26555c1.pdf]

## Supplemental Information for Article Titled: “First-principles study of structural stability, dynamical and mechanical properties of $\text{Li}_2\text{FeSiO}_4$ polymorphs”

P. Vajeeston,\* and H. Fjellvåg

Center for Materials Sciences and Nanotechnology, Department of Chemistry, University of Oslo, P.O. Box 1033 Blindern, N-0315 Oslo, Norway

E-mail: ponniahv@kjemi.uio.no

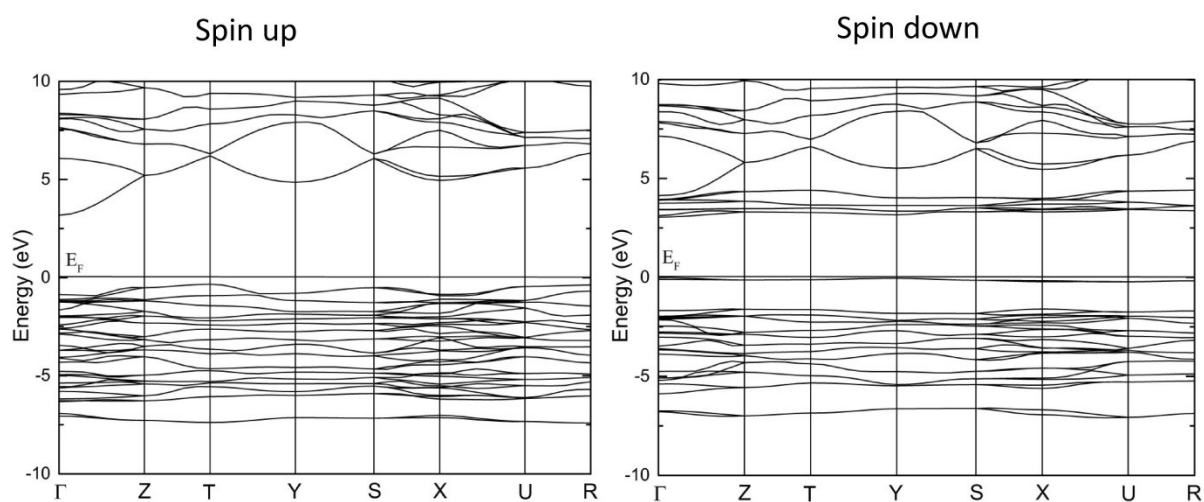

**Fig.S1** Calculated electronic up-spin and down-spin band structure of  $\text{Li}_2\text{FeSiO}_4$  in  $Pmn2_1$  structure. The Fermi level is set to zero.

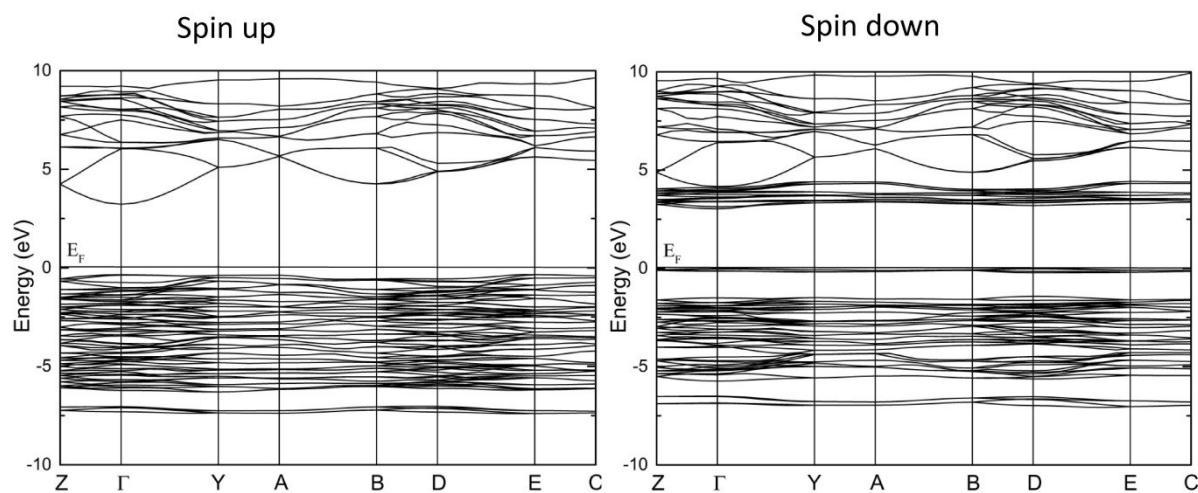

**Fig.S2** Calculated electronic up-spin and down-spin band structure of  $\text{Li}_2\text{FeSiO}_4$  in  $P2_1$  structure. The Fermi level is set to zero.

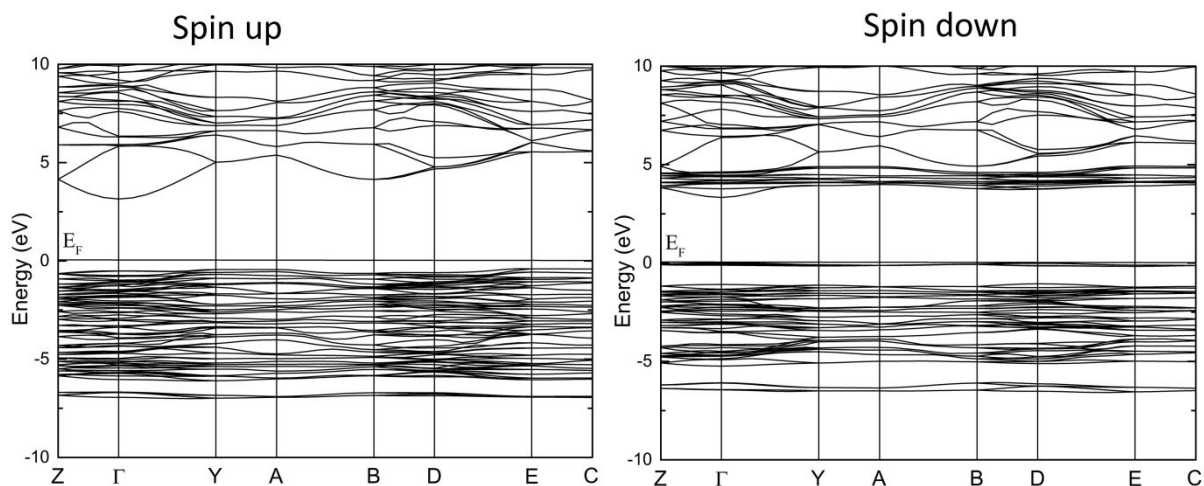

**Fig.S3** Calculated electronic up-spin and down-spin band structure of  $\text{Li}_2\text{FeSiO}_4$  in  $P2_1/c$  structure. The Fermi level is set to zero.

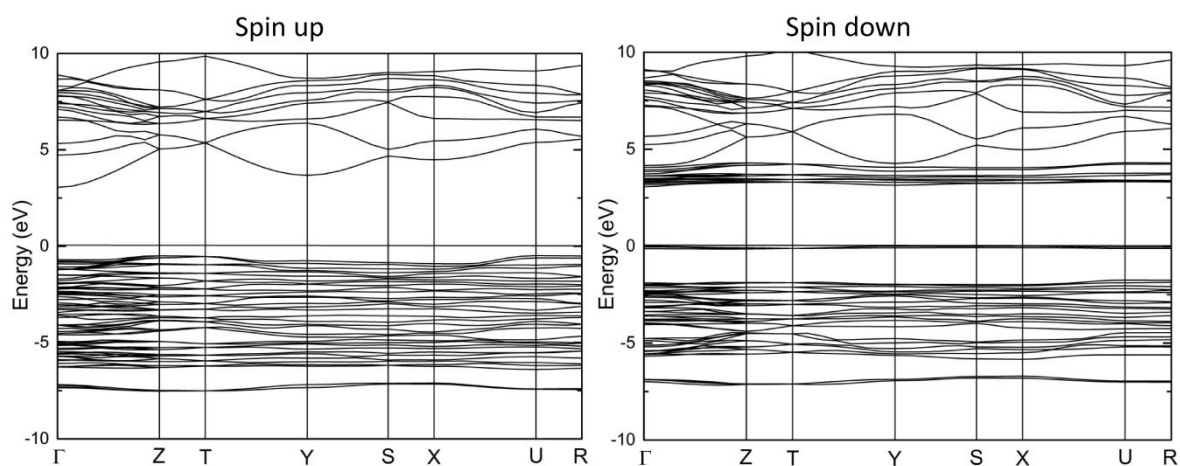

**Fig.S4** Calculated electronic up-spin and down-spin band structure of  $\text{Li}_2\text{FeSiO}_4$  in  $Pbn2_1$  structure. The Fermi level is set to zero.

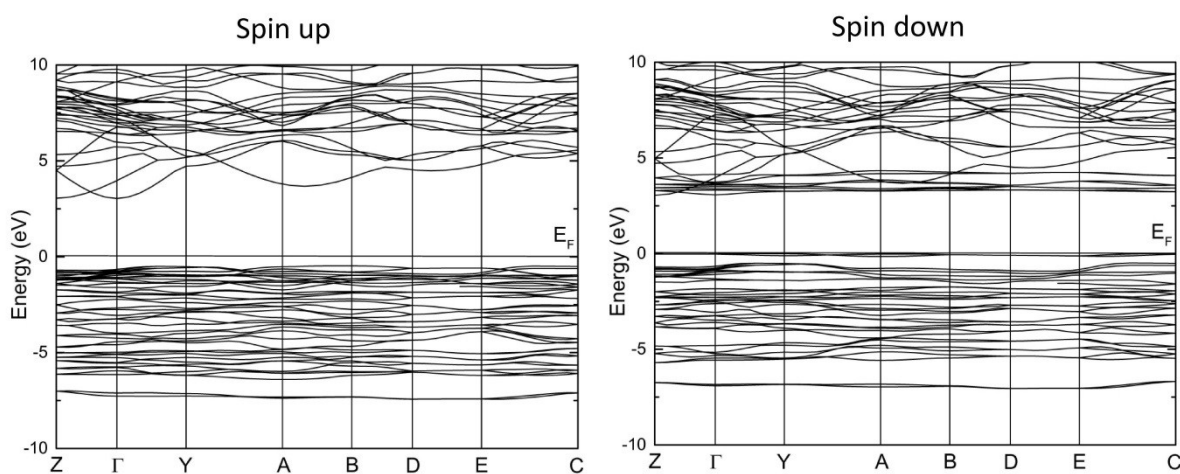

**Fig.S5** Calculated electronic up-spin and down-spin band structure of  $\text{Li}_2\text{FeSiO}_4$  in  $Pmn2_1\text{-mod}$  structure. According to the structural analysis the modified  $Pmn2_1$  structure ( $Pmn2_1\text{-mod}$ ) can be described in monoclinic (space group  $Pc$ ; space group number 7) structure. The Fermi level is set to zero.

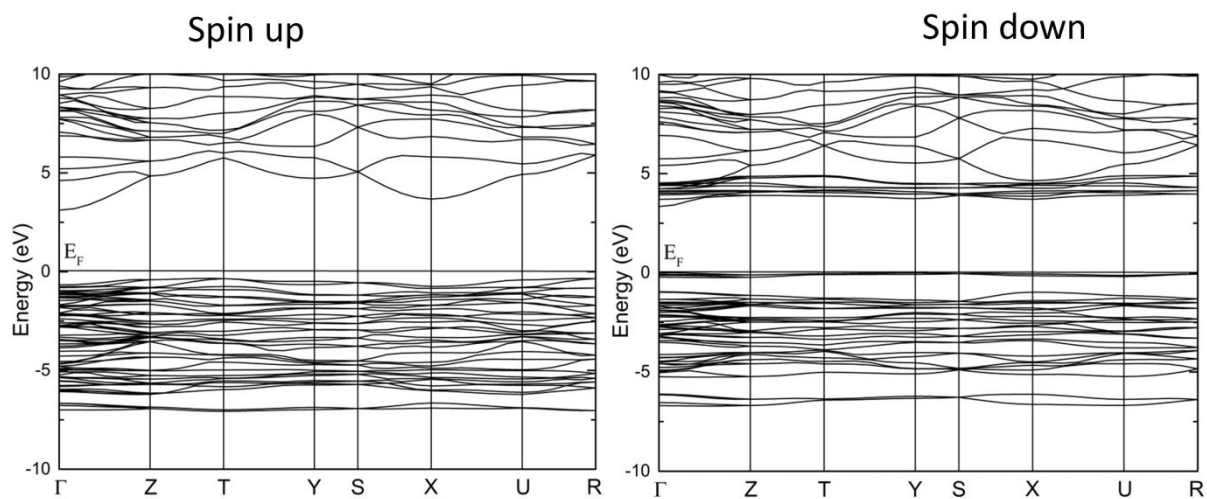

**Fig.S6** Calculated electronic up-spin and down-spin band structure of  $\text{Li}_2\text{FeSiO}_4$  in  $Pmbn$  structure. The Fermi level is set to zero.

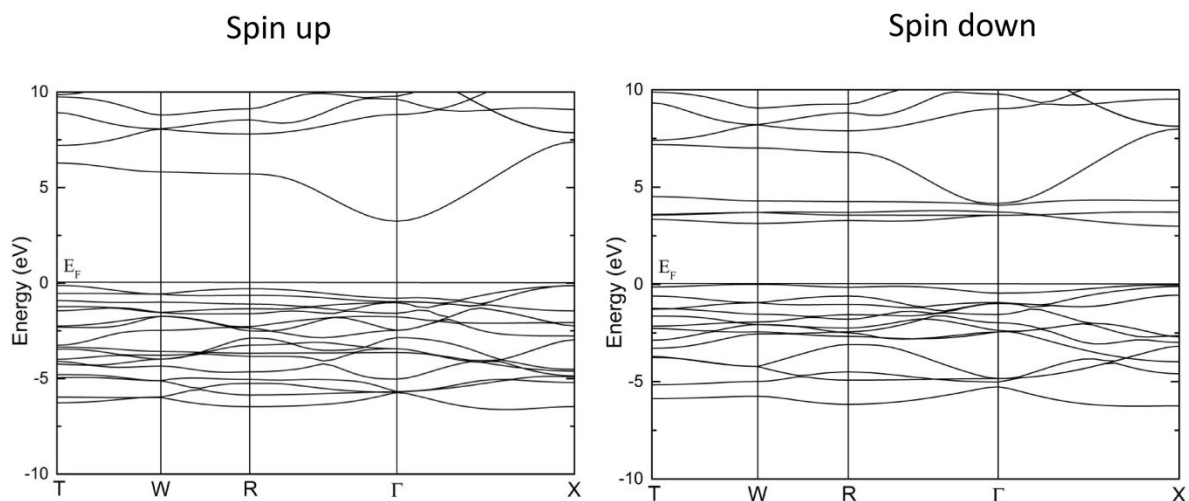

**Fig. S7** Calculated electronic up-spin and down-spin band structure of  $\text{Li}_2\text{FeSiO}_4$  in  $I222$  structure. The Fermi level is set to zero.

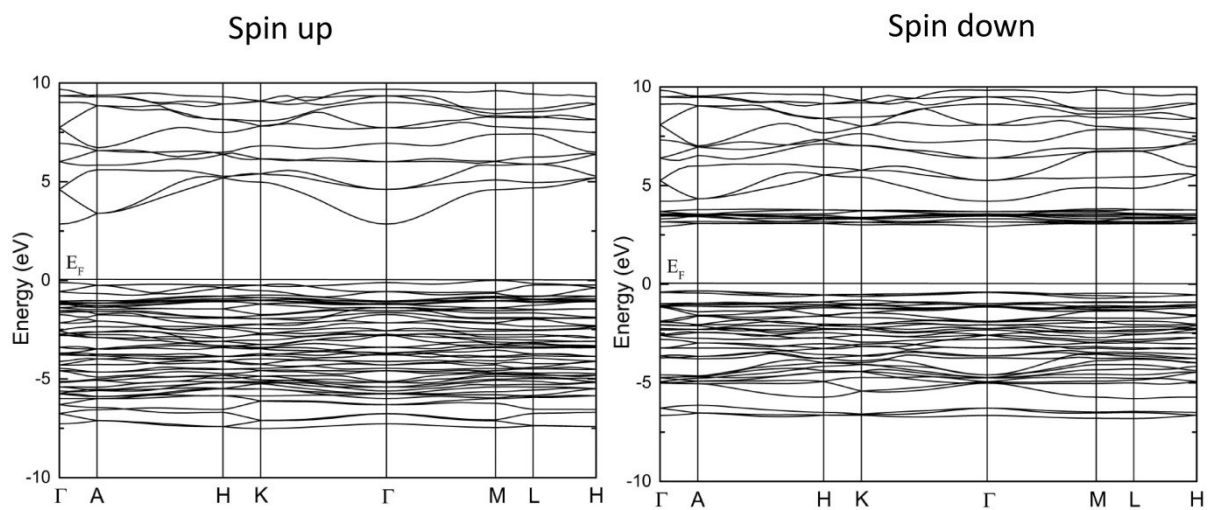

**Fig.S8** Calculated electronic up-spin and down-spin band structure of  $\text{Li}_2\text{FeSiO}_4$  in P3121 structure. The Fermi level is set to zero.

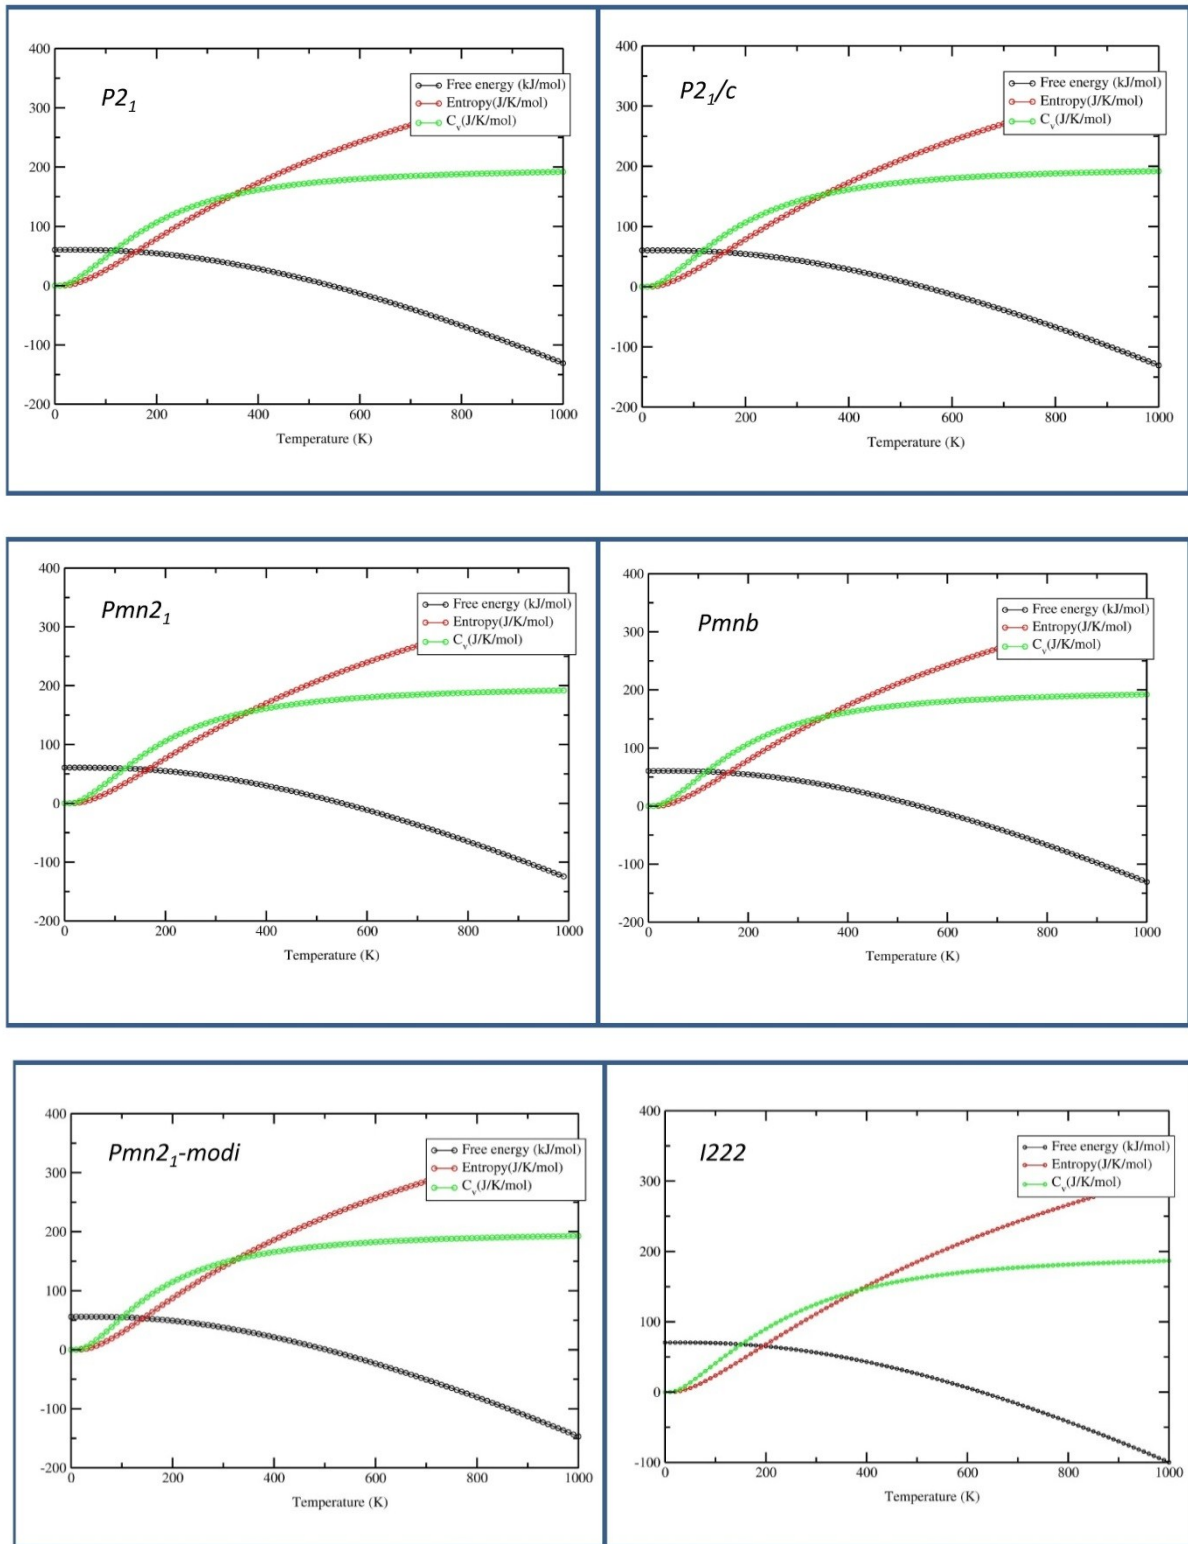

**Fig.S9** Calculated free energy (in kJ/mol), entropy (in J/K/mol.) and lattice heat capacity ( $C_v$ ; in J/K/mol.) as a function of teperature for  $\text{Li}_2\text{FeSiO}_4$  in  $P2_1$ ,  $P2_1/c$ ,  $Pmn2_1$ ,  $Pmnb$ ,  $Pmn2_1\text{-modi}$  and  $I222$  modifications.
